# Supplementary material
Source: HighWire-hosted journal article supplement (https://openres.ersjournals.com/content/7/3/00850-2020)
Supplement: inline-supplementary-material-1 [file inline-supplementary-material-1.pdf]

# Current Strategies for the Diagnosis and Treatment of Chronic Thromboembolic Pulmonary Hypertension Around the World

## Methods

19 countries (Australia, Austria, Belgium, Brazil, Denmark, Finland, Germany, Italy, Japan, the Netherlands, Poland, Russia, Slovakia, Spain, Switzerland, Taiwan, Turkey, the United Kingdom, and the United States).

### Data Cleaning:

An initial data report was provided by David Bowers, the consultant statistician to the ICA Board, on 9 November 2017. This was based on a preliminary inspection of the data; proposals were made and advice sought on a small number of cases of missing data, incomplete data, outliers, protocol violations, and clarification of definitions. Responses and guidance were received by 5 December 2017, allowing the data to be cleaned prior to analysis. The main points acted upon were:

a) Two patients were initially included in the registry database but had no recorded diagnosis of CTEPH and no recorded assessment for treatment/intervention. They were therefore excluded from the analysis, so that the final dataset consisted of 1010 patients.

b) Five patients had a date of PEA (operation) earlier than the recorded date of right heart catheterization (diagnosis), making the derived variable “time from diagnosis to PEA” negative. Since PEA would not have been performed without a diagnosis, the “time from diagnosis to PEA” for these patients was set to zero (i.e. diagnosis was assumed to be on the date of operation).

c) Three patients had date of BPA (intervention) earlier than the recorded date of right heart catheterization (diagnosis). The “time from diagnosis to first BPA” was set to zero for these

patients.

d) Several patients had a PVR value of 0. This was treated as missing data.

e) Some unusually high PVR values (from 2000 to 6880 dyn·s·cm<sup>-5</sup>) and one negative PVR value were advised to be retained.

f) A small number of very low PVR values (below 10 dyn·s·cm<sup>-5</sup>) were attributed to these values being measured in Wood units. They were therefore multiplied by 80 to convert to dyn·s·cm<sup>-5</sup>.

## Financial Support

The study was funded by a grant of Bayer AG, Merck Sharp & Dohme Corp., a subsidiary of Merck & Co., Inc., Kenilworth, NJ, USA, and of Actelion Pharmaceuticals Ltd., Allschwil, CH.

The companies had no influence on data interpretation and reporting of the registry. The New International CTEPH Registry is registered on [clinicaltrials.gov](https://clinicaltrials.gov) under "<https://clinicaltrials.gov/ct2/show/NCT02656238>".

## Disclosures

S.G. reports personal fees from Actelion, Bayer, GSK, MSD and Pfizer.

A.M.D. reports personal fees from Actelion, Bayer and MSD.

M.D. reports grants and personal fees from Actelion as well as personal fees from Bayer, M.S.D., Reata and Bellarophon.

D.P.J. reports personal fees from Actelion, as well as grants and personal fees from Bayer.

D.G.K. reports grants, personal fees and non-financial support from Actelion, Bayer and G.S.K., as well as personal fees and non-financial support from MSD.

N.H.K. reports personal fees from Actelion, Bayer and Merck, as well as grants from United Therapeutics and SoniVie,

1 I.M.L. reports grants and personal fees from Actelion and AOP Orphan Pharma, personal  
2 fees from MSD and Ferrer and non-financial support from Medtronic.

3 M.M.M. has acted as a consultant to Actelion and Wexler Surgical.

4 H.M. reports personal fees from Actelion, AOP orphan Pharmaceuticals AG, Bayer, Glaxo  
5 Smith Kline, Pfizer Japan, Inc, United Therapeutics, Nippon Shinyaku, Co, Ltd and Kaneka  
6 Medix Corporation.

7 A.O. reports personal fees from Nippon Shinyaku Co., Ltd.

8 C.B.W. reports personal fees from Actelion, AOP, Bayer, MSD and Pfizer.

9 E.M. reports personal fees from Actelion, Bayer, MSD and BMS.

10 J.P.Z. reports personal fees and non-financial support from Actelion and Merck as well as  
11 non-financial support from GSK.

12 K.N., E.F., S.P.H., J.S.O.A., R.Q., R.S.K., G.S. and B.Y. report no conflicts of interest.

#### 14 Data Availability

15 This data underlying this article are the property of the International CTEPH  
16 Association (ICA). Data will be shared on reasonable request to the corresponding  
17 author with permission of the ICA.

TABLE S1. Patient Disposition, by the 34 sites of the CTEPH Registry

| Site Num | Name                         | City        | Country | Region | Number of patients | PEA only candidates | Both PEA & BPA candidates | BPA only candidates | Neither candidates | PEA centre * | BPA centre * |
|----------|------------------------------|-------------|---------|--------|--------------------|---------------------|---------------------------|---------------------|--------------------|--------------|--------------|
| 2        | Papworth Hospital            | Cambridge   | UK      | Europe | 66                 | 45                  | 1                         | 7                   | 13                 | X            | X            |
| 3        | Medical University of Vienna | Vienna      | Austria | Europe | 38                 | 22                  | 0                         | 15                  | 1                  | X            | X            |
| 4        | UZ Leuven                    | Leuven      | Belgium | Europe | 34                 | 22                  | 2                         | 2                   | 8                  | X            | X            |
| 5        | Kerckhoff-Klinik             | Bad Nauheim | Germany | Europe | 253                | 173                 | 4                         | 51                  | 25                 | X            | X            |
| 6        | UCSD Medical Centre          | La Jolla    | USA     | AAO    | 24                 | 22                  | 0                         | 2                   | 0                  | X            | X            |
| 7        | European Health Centre       | Otwock      | Poland  | Europe | 9                  | 1                   | 1                         | 4                   | 3                  |              | X            |
| 8        | MH Hannover                  | Hannover    | Germany | Europe | 3                  | 1                   | 1                         | 1                   | 0                  |              | X            |
| 9        | Sheffield Teaching Hospitals | Sheffield   | UK      | Europe | 35                 | 29                  | 0                         | 0                   | 6                  |              |              |
| 10       | Marmara University           | Istanbul    | Turkey  | Europe | 82                 | 82                  | 0                         | 0                   | 0                  | X            |              |

| Site<br>Num | Name                          | City        | Country     | Region | Number<br>of<br>patients | PEA only<br>candidates | Both PEA<br>& BPA<br>candidates | BPA only<br>candidates | Neither<br>candidates | PEA<br>centre<br>* | BPA<br>centre<br>* |
|-------------|-------------------------------|-------------|-------------|--------|--------------------------|------------------------|---------------------------------|------------------------|-----------------------|--------------------|--------------------|
|             | Hospital                      |             |             |        |                          |                        |                                 |                        |                       |                    |                    |
| 11          | Kyorin University             | Tokyo       | Japan       | Japan  | 14                       | 1                      | 0                               | 13                     | 0                     |                    | X                  |
|             | Hospital                      |             |             |        |                          |                        |                                 |                        |                       |                    |                    |
| 12 #        | RICP Novosibirsk              | Novosibirsk | Russia      | Europe | 0                        | 0                      | 0                               | 0                      | 0                     |                    |                    |
| 13          | IRCCS San Matteo              | Pavia       | Italy       | Europe | 119                      | 106                    | 0                               | 1                      | 12                    | X                  |                    |
| 14          | Hospital Sao Paulo            | Sao Paulo   | Brazil      | AAO    | 36                       | 18                     | 0                               | 0                      | 18                    | X                  |                    |
| 15          | Western Infirmary,<br>Glasgow | Glasgow     | UK          | Europe | 7                        | 1                      | 1                               | 1                      | 4                     |                    |                    |
| 16          | VU Medical Centre             | Amsterdam   | Netherlands | Europe | 28                       | 21                     | 1                               | 2                      | 4                     | X                  | X                  |
| 18          | Chiba University Hospital     | Chiba       | Japan       | Japan  | 19                       | 14                     | 0                               | 1                      | 4                     | X                  |                    |
| 21          | National Taiwan Uni           | Taipei      | Taiwan      | AAO    | 18                       | 9                      | 0                               | 3                      | 6                     | X                  | X                  |
|             | Hospital                      |             |             |        |                          |                        |                                 |                        |                       |                    |                    |
| 22          | Aarhus University<br>Hospital | Aarhus      | Denmark     | Europe | 3                        | 1                      | 0                               | 0                      | 2                     | X                  |                    |

| Site<br>Num | Name                           | City       | Country   | Region | Number<br>of<br>patients | PEA only<br>candidates | Both PEA<br>& BPA<br>candidates | BPA only<br>candidates | Neither<br>candidates | PEA<br>centre<br>* | BPA<br>centre<br>* |
|-------------|--------------------------------|------------|-----------|--------|--------------------------|------------------------|---------------------------------|------------------------|-----------------------|--------------------|--------------------|
| 25          | Cardiology Research<br>Centre  | Moscow     | Russia    | Europe | 26                       | 12                     | 4                               | 10                     | 0                     | X                  | X                  |
| 26          | Okayama Medical<br>Centre      | Okayama    | Japan     | Japan  | 47                       | 0                      | 0                               | 47                     | 0                     |                    | X                  |
| 27          | Royal Free London NHS<br>Trust | London     | UK        | Europe | 17                       | 3                      | 1                               | 0                      | 13                    |                    |                    |
| 28          | St Vincent's Hospital          | Sydney     | Australia | AAO    | 1                        | 0                      | 0                               | 0                      | 1                     |                    | X                  |
| 29          | Slovak Medical<br>University   | Bratislava | Slovakia  | Europe | 6                        | 2                      | 0                               | 0                      | 4                     |                    |                    |
| 30          | University of Maryland         | Baltimore  | USA       | AAO    | 2                        | 1                      | 0                               | 0                      | 1                     | X                  |                    |
| 31          | Hospital Clinic Barcelona      | Barcelona  | Spain     | Europe | 18                       | 10                     | 0                               | 0                      | 8                     | X                  |                    |
| 32          | HU 12 de Octubre               | Madrid     | Spain     | Europe | 2                        | 2                      | 0                               | 0                      | 0                     | X                  |                    |
| 38          | Wojewodzki Szpital             | Wroclaw    | Poland    | Europe | 15                       | 2                      | 0                               | 8                      | 5                     |                    | X                  |
| 43          | Kobe University Hospital       | Kobe       | Japan     | Japan  | 35                       | 10                     | 2                               | 18                     | 5                     | X                  | X                  |

| Site Num | Name                            | City      | Country     | Region | Number of patients | PEA only candidates | Both PEA & BPA candidates | BPA only candidates | Neither candidates | PEA centre * | BPA centre * |
|----------|---------------------------------|-----------|-------------|--------|--------------------|---------------------|---------------------------|---------------------|--------------------|--------------|--------------|
| 44       | The Alfred Hospital             | Melbourne | Australia   | AAO    | 10                 | 8                   | 0                         | 0                   | 2                  | X            |              |
| 45       | Uni of Sao Paulo Medical School | Sao Paulo | Brazil      | AAO    | 7                  | 7                   | 0                         | 0                   | 0                  |              |              |
| 46       | Helsinki University Hospital    | Helsinki  | Finland     | Europe | 8                  | 8                   | 0                         | 0                   | 0                  | X            |              |
| 47       | University Hospital of Zurich   | Zurich    | Switzerland | Europe | 3                  | 1                   | 0                         | 0                   | 2                  | X            |              |
| 49       | Cleveland Clinic                | Cleveland | USA         | AAO    | 18                 | 14                  | 1                         | 2                   | 1                  | X            | X            |
| 51       | Medical University of Warsaw    | Warsaw    | Poland      | Europe | 7                  | 1                   | 1                         | 5                   | 0                  |              |              |
| TOTAL:   |                                 |           |             |        | 1010               | 649                 | 20                        | 193                 | 148                |              |              |

\* Site classified as PEA Centre or BPA Centre based on being a centre at which at least one such procedure has been documented in the registry (CRF 22 or 28) up to the time of baseline analysis, either on one of their own patients or on a patient enrolled by another centre.

# This site had recruited but not provided sufficient diagnostic data at the time of the Baseline Analysis datacut, hence no patient entered the analysis.



Table S2. PH Treatment at Diagnosis by Patient Disposition to Intervention, All Regions (n=1010)

|                                   | PEA Candidates | BPA Candidates | Total Candidates, PEA or BPA | Neither PEA nor BPA |
|-----------------------------------|----------------|----------------|------------------------------|---------------------|
|                                   | (n=669)        | (n=213)        | (n=862)                      | (n=148)             |
| PH-targeted drug treatment, n (%) | 175 (26.2%)    | 116 (54.5%)    | 282 (37.7%)                  | 80 (54.1%)          |
| of which †                        |                |                |                              |                     |
| GCS                               | 43 (24.6%)     | 59 (50.9%)     | 98 (34.3%)                   | 37 (46.3%)          |
| PCA                               | 10 (5.7%)      | 21 (18.1%)     | 30 (10.6%)                   | 2 (2.5%)            |
| ERA                               | 40 (22.9%)     | 18 (15.5%)     | 58 (20.6%)                   | 14 (17.5%)          |
| PDE5i                             | 104 (59.4%)    | 44 (37.9%)     | 143 (50.7%)                  | 34 (42.5%)          |
| Other                             | 3 (1.7%)       | 3 (2.6%)       | 6 (2.1%)                     | 3 (3.8%)            |
| Single therapy                    | 154 (88.0%)    | 89 (76.7%)     | 235 (83.3%)                  | 70 (87.5%)          |
| Double therapy                    | 17 (9.7%)      | 25 (21.6%)     | 41 (14.5%)                   | 10 (12.5%)          |
| Triple therapy                    | 4 (2.3%)       | 2 (1.7%)       | 6 (2.1%)                     | 0 (0.0%)            |

---

PH, pulmonary hypertension; PEA indicates pulmonary endarterectomy; BPA, balloon pulmonary angioplasty; GCS, guanylate cyclase stimulator; PCA, prostacyclin analog; ERA, endothelin receptor antagonist, PDE5i, phosphodiesterase-5 inhibitor.

† Not mutually exclusive. More than one medication class can be prescribed.

Table S3. BPA Patients – Characteristics and Immediate Post-Intervention Experience, by Regions (n=175)

|                                                                        | Japan<br>(n = 77) | Europe/AAO <sup>#</sup><br>(n = 98) | <i>P</i> -value<br>(exploratory) |
|------------------------------------------------------------------------|-------------------|-------------------------------------|----------------------------------|
| Sex, n (%) male                                                        | 15 (19.5%)        | 43 (43.9%)                          | 0.001                            |
| Age at first BPA, years                                                | 65 [57.3–75.0]    | 64.0 [51.0–72.5]                    | 0.194                            |
| Time from diagnosis<br>to first BPA (days)                             | 12.0 [4.0–73.3]   | 165 [82.5–279.5]                    | < 0.001                          |
| Number of BPAs<br>per patients                                         | 5.0 [4.0–6.0]     | 4.0 [3.0–6.0]                       | 0.130                            |
| Time between BPA<br>sessions, days                                     | 9.5 [7.0–55.0]    | 49.0 [35.0–79.0]                    | < 0.001                          |
| Last PVR calculated end of<br>last BPA session, dyn·s·cm <sup>-5</sup> | 282 [221–356]     | 318 [265–501]                       | 0.008                            |

|                                                          |                  |                  |         |
|----------------------------------------------------------|------------------|------------------|---------|
| Reduction in PVR since diagnosis, dyn·s·cm <sup>-5</sup> | 400 [195–618]    | 261 [112–435]    | 0.005   |
| Percentage reduction in PVR since diagnosis              | 60.2 [38.8–72.2] | 41.5 [26.8–56.4] | < 0.001 |
| Treatment with PH-targeted drug on discharge, n (%) *    | 28 (38.4%)       | 54 (72.0%)       | < 0.001 |
| Patient on oxygen at discharge, n (%) *                  | 50 (68.5%)       | 5 (5.4%)         | < 0.001 |

---

Values are expressed as median with first and third quartiles [Q1–Q3] or number and percentage of patients.

BPA indicates balloon pulmonary angioplasty PVR, pulmonary vascular resistance.

\* Data were missing for some patients; PH, pulmonary hypertension; # Europe and AAO were put together since AAO included only 5 patients with a BPA procedure and all countries learned this refined technique from Japan.

TABLE S4. Time to death (PH related death) – all patients (N = 39), by region and by intervention

|                                                |        | By region                                     |                    |                  |                | By intervention |                            |                             |
|------------------------------------------------|--------|-----------------------------------------------|--------------------|------------------|----------------|-----------------|----------------------------|-----------------------------|
|                                                |        | All patients<br>(N = 39)                      | Europe<br>(N = 32) | Japan<br>(N = 2) | AAO<br>(N = 5) | PEA<br>(N = 21) | BPA (no<br>PEA)<br>(N = 3) | No intervention<br>(N = 15) |
| Time from<br>diagnosis to<br>death<br>(months) | Median | 4.44                                          | 4.58               | 9.02             | 4.44           | 4.01            | 10.84                      | 6.01                        |
|                                                | Min    | 0.13                                          | 0.13               | 0.30             | 1.31           | 0.13            | 10.74                      | 0.30                        |
|                                                | Max    | 29.70                                         | 29.70              | 17.74            | 10.38          | 21.16           | 11.96                      | 29.70                       |
|                                                |        | All patients with<br>intervention<br>(N = 24) | Europe<br>(N = 21) | Japan<br>(N = 0) | AAO<br>(N = 3) | PEA<br>(N = 21) | BPA (no<br>PEA)<br>(N = 3) |                             |
| Time from<br>procedure<br>to death *           | Median | 0.79                                          | 0.85               | -                | 0.46           | 0.69            | 2.07                       |                             |
|                                                | Min    | 0.00                                          | 0.00               |                  | 0.39           | 0.00            | 1.97                       |                             |
|                                                | Max    | 5.98                                          | 5.98               |                  | 1.25           | 5.98            | 3.06                       |                             |

Values are expressed as median with minimum and maximum. \* For BPA patients, time measured from last recorded BPA session

## Figures

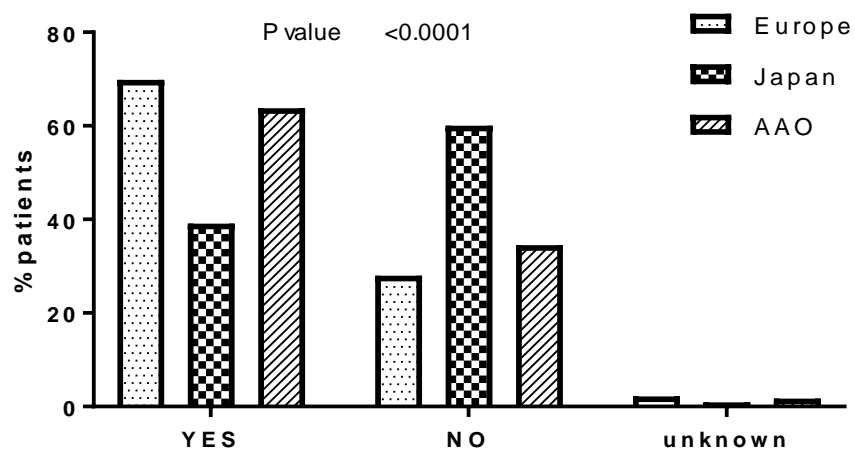

Figure S1. History of acute pulmonary embolism preceding CTEPH, by regions. AAO = America and others. *P*-Value is in the exploratory sense.

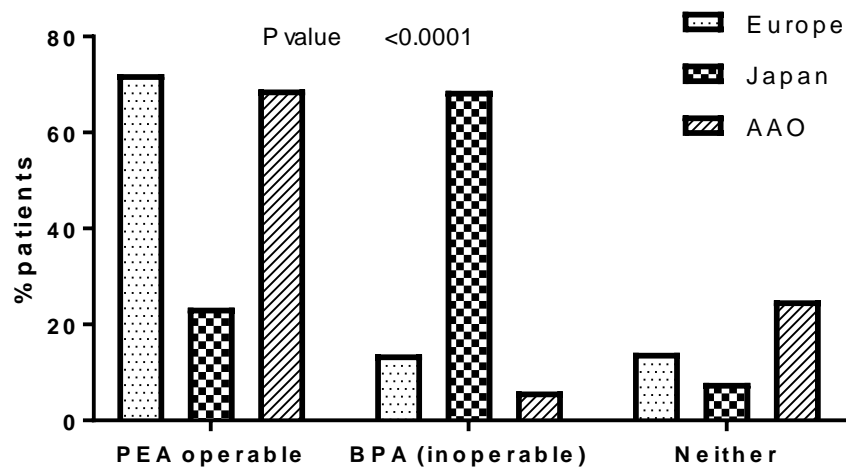

Figure S2. Distribution of patients regarding their disposition to surgery by PEA (pulmonary endarterectomy), intervention with BPA (balloon pulmonary angioplasty) or neither, by regions. AAO = America and others. *P*-Value is in the exploratory sense.

## Figure Legends

Supplemental Figure S1. Distribution of patients regarding their disposition to surgery by PEA (pulmonary endarterectomy), intervention with BPA (balloon pulmonary angioplasty) or neither, by regions. AAO = America and others. *P*-Value is in the exploratory sense.

Supplemental Figure S2. History of acute pulmonary embolism preceding CTEPH, by regions. AAO = America and others. *P*-Value is in the exploratory sense.
